# Supplementary material
Source: PubMed Central journal article supplement (PMC2637315)
Supplement: embor2008242-s1.pdf [file embor2008242-s1.pdf]

**Supplementary Table 1. Manipulation of mtDNA or of proteins involved in its maintenance to generate disease models in mice.**

| Mouse model                                              | Genetic modification/<br>promoter                        | Main phenotype                                                                                           | Age of onset<br>(months) | Lifespan           | MtDNA phenotype                                                  | Reference                                                  |
|----------------------------------------------------------|----------------------------------------------------------|----------------------------------------------------------------------------------------------------------|--------------------------|--------------------|------------------------------------------------------------------|------------------------------------------------------------|
| <b>Transmitochondrial models</b>                         |                                                          |                                                                                                          |                          |                    |                                                                  |                                                            |
| Mito-mice                                                | Cytoplasmic hybrid introducing mutant mtDNA into embryo  | Early-onset mitochondrial cardiomyopathy and myopathy, renal failure, deafness, male infertility, anemia | 5                        | 7 months           | Single maternally inherited mtDNA deletion, (mtDNA duplications) | Inoue <i>et al</i> , 2000; Nakada <i>et al</i> , 2004      |
| Chloramphenicol resistance                               | Cytoplasmic hybrid introducing mutant mtDNA into embryo  | Perinatal/ in utero lethality, growth retardation, severe cardiomyopathy, myopathy. Chimeras: cataracts  | -                        | 12 hours – 11 days | Point mutation in mtDNA 16 rRNA gene                             | Marchington <i>et al</i> , 1999, Sligh <i>et al</i> , 2000 |
| COI + ND6 (COI T6589C + ND6 13885insCdelT mutation)      | Cytoplasmic hybrid introducing mutant mtDNA into embryo  | Mitochondrial myopathy and cardiomyopathy                                                                | ~12                      | > 12 months        | Two point mutations in CI and COX subunits                       | Fan <i>et al</i> , 2008                                    |
| NZB+BALB                                                 | Cytoplasmic hybrid introducing variant mtDNA into embryo | No pathology, tissue-specific mtDNA segregation                                                          | -                        | normal             | Heteroplasmy of two normal variants                              | Jenuth <i>et al</i> , 1996; Battersby <i>et al</i> , 2003  |
| <b>Restriction endonuclease targeted to mitochondria</b> |                                                          |                                                                                                          |                          |                    |                                                                  |                                                            |
| PstI, muscle-specific                                    | skeletal muscle actin promoter                           | Mitochondrial myopathy                                                                                   | 6-7                      | > 7 months         | mtDNA depletion, multiple deletions                              | Srivastava & Moraes, 2005                                  |

| <b>Manipulation of mtDNA by modifying nuclear disease genes</b> |                                                              |                                                      |     |             |                                                    |                                                             |
|-----------------------------------------------------------------|--------------------------------------------------------------|------------------------------------------------------|-----|-------------|----------------------------------------------------|-------------------------------------------------------------|
| ANT1 <sup>-/-</sup>                                             | Knockout of exons 1-3 (replaced by PGKneo)                   | Mitochondrial myopathy and cardiomyopathy            | 4-6 | normal      | Multiple mtDNA deletions                           | Graham <i>et al</i> , 1997                                  |
| TP <sup>-/-</sup> ,UP <sup>-/-</sup>                            |                                                              | No phenotype                                         | -   | normal      | -                                                  | Haraguchi <i>et al</i> , 2002                               |
| Twinkle dup353-365 transgenic, Deletor                          | Murine cDNA transgene, human beta-actin promoter             | Late-onset mitochondrial myopathy, neurodegeneration | 12  | normal      | Multiple mtDNA deletions in brain, skeletal muscle | Tyynismaa <i>et al</i> , 2005                               |
| PolgA D181A heart-specific transgenic                           | Murine cDNA transgene, $\alpha$ -myosin heavy chain promoter | Cardiomyopathy                                       | 1   | > 6 months  | mtDNA point mutations, deletions                   | Zhang <i>et al</i> , 2000                                   |
| PolgA, Mutator                                                  | D257A knock-in to inactivate exonuclease activity            | Premature aging                                      | 6   | 12 months   | Random accumulation of mtDNA point mutations       | Trifunovic <i>et al</i> , 2004; Kujoth <i>et al</i> , 2005; |
| PolgA D181A brain-specific transgenic                           | Murine cDNA transgene, CaMKII $\alpha$ -promoter             | Mood disorder-like                                   | 4   | normal      | mtDNA point mutations, deletions                   | Kasahara <i>et al</i> , 2006                                |
| PolgA Y955C heart-specific transgenic                           | Murine cDNA transgene, $\alpha$ -myosin heavy chain promoter | Cardiomyopathy                                       | < 1 | 3-20 months | mtDNA depletion                                    | Lewis <i>et al</i> , 2007                                   |

ANT1, Adenine nucleotide translocator; TP, Thymidine phosphorylase; UP, Uridine phosphorylase; PolgA, Mitochondrial DNA polymerase subunit alpha.

**Supplementary Table 2. Manipulation of mtDNA maintenance proteins to alter mtDNA copy number in mice.**

| <u>Mouse model</u>                                                      | <u>Phenotype</u>                                                                       | <u>Promoter</u>                                        | <u>Activation of transgene</u> | <u>Lifespan</u>   | <u>Effect on mtDNA</u>                                                                               | <u>Reference</u>            |
|-------------------------------------------------------------------------|----------------------------------------------------------------------------------------|--------------------------------------------------------|--------------------------------|-------------------|------------------------------------------------------------------------------------------------------|-----------------------------|
| <b>Proteins binding to mtDNA or functioning at the replication fork</b> |                                                                                        |                                                        |                                |                   |                                                                                                      |                             |
| TFAM <sup>-/-</sup>                                                     | Small size, no cardiac structure or optic disk, somites indistinct; embryonally lethal | Beta-actin cre (ubiquitous; knockout in heterozygotes) | Preimplantation                | E8.5-10.5         | Complete loss of mtDNA before E8.5 in homozygotes; heterozygotes: depletion of 66% of control level. | Larsson <i>et al</i> , 1998 |
| TFAM <sup>-/-</sup> heart                                               | Dilated cardiomyopathy (skeletal muscle asymptomatic) ; decreased activity P10         | Muscle creatin kinase (CKMM-cre; muscle and heart)     | E13                            | 2-4 weeks         | MtDNA depletion 25% of controls e in heart, 66% in skeletal muscle                                   | Wang <i>et al</i> , 1999    |
|                                                                         | Neonatal death; Dilated cardiomyopathy                                                 | Myosin heavy chain cardiac isoform; heart (MyHCA-cre)  | E8                             | P7 (25% 3 months) | MtDNA depletion to 30% of controls at E18.5                                                          | Li <i>et al</i> , 2000      |
| TFAM <sup>-/-</sup> pancreatic $\beta$ -cell                            | Pancreatic $\beta$ -cell loss                                                          | Rat insulin-2 (RIP-cre) Pancreatic beta cells + brain  | Postnatal                      | NA                |                                                                                                      | Silva <i>et al</i> , 2000   |

|                                                             |                                                                                                       |                                                                    |                 |                                |                                                                                                                                |                                   |
|-------------------------------------------------------------|-------------------------------------------------------------------------------------------------------|--------------------------------------------------------------------|-----------------|--------------------------------|--------------------------------------------------------------------------------------------------------------------------------|-----------------------------------|
| TFAM <sup>-/-</sup><br>neocortex,<br>neuronal –<br>specific | Corticohippocampal<br>late-onset<br>neurodegeneration                                                 | Calcium-dependent<br>calmodulin kinase II<br>promoter (CamKII-cre) | P14             | 5-6 months                     | MtDNA<br>depletion 60%<br>of controls at 2-<br>6 months in<br>brain, likely<br>close to<br>complete<br>depletion in<br>neurons | Sorensen <i>et al</i> , 2001      |
| TFAM <sup>-/-</sup><br>skeletal muscle                      | Mitochondrial<br>myopathy at 3-4<br>months; weakness,<br>weight loss, loss of<br>spontaneous activity | Myosin light-chain 1f<br>(skeletal muscle fast<br>fibers)          | E9.5            | Sacrificed<br>at 4-5<br>months | MtDNA<br>depletion of<br>~35% at 2-4<br>months                                                                                 | Wredenberg<br><i>et al</i> , 2002 |
| TFAM <sup>-/-</sup><br>dopamine<br>neurons                  | Decreased locomotion<br>(14 weeks) tremor,<br>rigidity, twitching (20<br>weeks)                       | Dopamine transporter<br>(DAT)                                      | Postnatal       | Sacrificed<br>at 45 weeks      | Not quantified,<br>but likely close-<br>to-complete loss<br>in dopaminergic<br>neurons                                         | Ekstrand <i>et al</i> , 2007      |
| PolgA <sup>-/-</sup>                                        | Small, 'less developed'<br>embryonic lethality                                                        | Beta-actin (ubiquitous;<br>knockout in<br>heterozygotes)           | Preimplantation | E7.5-8.5                       | Heterozygotes:<br>no significant<br>effect on<br>mtDNA<br>Homozygotes:<br>close to<br>complete loss of<br>mtDNA                | Hance <i>et al</i> ,<br>2005      |

|                                   |                                                                                          |                                                                 |  |             |                                                                                                   |                                                           |
|-----------------------------------|------------------------------------------------------------------------------------------|-----------------------------------------------------------------|--|-------------|---------------------------------------------------------------------------------------------------|-----------------------------------------------------------|
| RNaseH1 -/-                       | Embryonic lethality; no gross morphological changes before E8.5 after which did not grow | Knock-out with neo-cassette replacing exons II-V                |  | E9.5        | Homozygotes: mtDNA depletion 1% of controls at E8.5<br>Heterozygotes: normal mtDNA amount at E8.5 | Cerritelli <i>et al</i> , 2003                            |
| <b>Nucleoside pool regulation</b> |                                                                                          |                                                                 |  |             |                                                                                                   |                                                           |
| RRM2B-/-                          | Growth retardation from week 5, renal failure, multiorgan failure, muscle atrophy        | Knock-out with neo-cassette replacing exons III-IV              |  | 11-12 weeks | mtDNA depletion 6% of control muscle & kidney at 12 weeks                                         | Kimura <i>et al</i> , 2003<br>Bourdon <i>et al</i> , 2007 |
| TK2-/-                            | Growth retardation from P10, tremor, progressive weakness, encephalomyelopathy           | H126N knock-in point mutation, homologous to human MDS mutation |  | P14         | mtDNA depletion 12% in brain, 20% in heart, 32% in skeletal muscle at P12                         | Akman <i>et al</i> , 2008                                 |
| TK2-/-                            | Growth retardation from P7, shivering P10                                                | Knock-out with neo-cassette replacing exons IV-part of V        |  | ~P15        | mtDNA depletion 20% of control in skeletal muscle, 20-30% in brain, 80% in heart at P12           | Zhou <i>et al</i> , 2008                                  |
| <b>Transcriptional regulation</b> |                                                                                          |                                                                 |  |             |                                                                                                   |                                                           |

|                         |                                                                                                                        |                                                                                   |     |                                                |                                                                                     |                                                         |
|-------------------------|------------------------------------------------------------------------------------------------------------------------|-----------------------------------------------------------------------------------|-----|------------------------------------------------|-------------------------------------------------------------------------------------|---------------------------------------------------------|
| NRF1 <sup>-/-</sup>     | Embryonic lethality in preimplantation; no morphological defects                                                       | Knock-out with neo-cassette replacing exon 3 and partially exons 2 and 4          |     | E3.5-6.5                                       | MtDNA depletion <5%-30% of control blastocysts                                      | Huo & Scarpulla, 2001                                   |
| <b>Unclear function</b> |                                                                                                                        |                                                                                   |     |                                                |                                                                                     |                                                         |
| MPV17 <sup>-/-</sup>    | Hearing loss, hair graying and lipoatrophy 5-6 months; glomerulosclerosis at 18 months                                 | insertional inactivation of the gene by a defective retroviral provirus transgene |     | Increased lethality after 1 year, max 700 days | MtDNA depletion 47% in kidney at 2 years, liver 5%, skeletal muscle 25% at 7 months | Weiher <i>et al</i> , 1990; Viscomi <i>et al</i> , 2008 |
| Hsp40 <sup>-/-</sup>    | Embryonic lethality/ cardiomyopathy (5 %); trabecular formation and pericardial effusion at E10.5 ; growth retardation | Alpha-myosin heavy chain ( $\alpha$ MyHC-Cre)                                     | <E8 | E10.5-13.5, some survive up to 10 weeks        | MtDNA depletion 20% of control heart, age unknown.                                  | Hayashi <i>et al</i> , 2006                             |

TFAM, Mitochondrial transcription factor A; PolgA, Mitochondrial DNA polymerase subunit A; RNaseH1, Ribonuclease H1, RRM2B, Ribonucleotide reductase M2 B; TK2, Thymidine kinase 2; NRF1, Nuclear respiratory factor 1; MPV17, Mitochondrial inner membrane protein; Hsp40, Mitochondrial chaperone, MDS, Mitochondrial DNA depletion syndrome. Times expressed in E (embryonal day), P (postnatal day), NA (not available)

**Supplementary Table 3. Mice with increased mtDNA copy number.**

| <u>Gene</u> | <u>Phenotype</u>                                       | <u>Genetic modification/Promoter</u>               | <u>Activation of transgene</u> | <u>Lifespan</u> | <u>Effect on mtDNA</u> | <u>Reference</u>              |
|-------------|--------------------------------------------------------|----------------------------------------------------|--------------------------------|-----------------|------------------------|-------------------------------|
| TFAM        | normal                                                 | human PAC-transgene with endogenous promoter       | Not known                      | normal          | Increased up to 70%    | Ekstrand <i>et al</i> , 2004  |
| TFAM        | normal; increased survival after myocardial infarction | human cDNA, Chicken $\beta$ -actin promoter        | Preimplantation                | normal          | Increased 50%          | Ikeuchi <i>et al</i> , 2005   |
| TK2         | normal                                                 | murine cDNA, $\alpha$ -myosin heavy chain promoter | <E8                            | normal          | Increased 40%          | Hosseini <i>et al</i> , 2007  |
| Twinkle     | normal                                                 | murine cDNA, Human $\beta$ -actin promoter         | Preimplantation                | normal          | Increased up to 300%   | Tynnismaa <i>et al</i> , 2004 |

TFAM, Mitochondrial transcription factor A; TK2, Thymidine kinase 2. Times expressed in E (embryonal day).
